# Supplementary material for: Immune checkpoint inhibitor treatment of a first cancer is associated with a decreased incidence of second primary cancer
Source: PubMed Central journal article supplement — ESMO Open. 2021 Jan 27;6(1):100044. doi: 10.1016/j.esmoop.2020.100044 (PMC7844579; doi:10.1016/j.esmoop.2020.100044), 2021-01-27
Supplement: mmc4.pdf [file mmc4.pdf]

**Supplementary Table : Secondary cancers according to the type of first cancer and to the treatment  
give for the first cancer**

|                              | Cytotoxics only     | Cytotoxics and Immunotherapy | Immunotherapy only | Neither Cytotoxics nor immunotherapy | ALL                 |
|------------------------------|---------------------|------------------------------|--------------------|--------------------------------------|---------------------|
|                              | 437 SPC / 16997     | 6 SPC /1131                  | 1 SPC /32          | 1386 SPC / 28669                     | 1830 SPC / 46829    |
| <b>FPC = Skin</b>            | <b>149 (0.9%)</b>   | <b>57 (5.0%)</b>             | <b>0 (0.0%)</b>    | <b>713 (2.5%)</b>                    | <b>919 (2.0%)</b>   |
| SPC                          |                     |                              |                    |                                      |                     |
| <b>ALL</b>                   | <b>9 (6,0%)</b>     | <b>0 (0,0%)</b>              | <b>0 (0,0%)</b>    | <b>37 (5,2%)</b>                     | <b>46 (5,0%)</b>    |
| Skin                         | 1                   | 0                            | 0                  | 1                                    | 2                   |
| Head & Neck                  | 1                   | 0                            | 0                  | 14                                   | 15                  |
| Lung                         | 0                   | 0                            | 0                  | 1                                    | 1                   |
| Prostate                     | 0                   | 0                            | 0                  | 2                                    | 2                   |
| Colorectal                   | 1                   | 0                            | 0                  | 0                                    | 1                   |
| Breast                       | 0                   | 0                            | 0                  | 1                                    | 1                   |
| Connective tissue            | 1                   | 0                            | 0                  | 0                                    | 1                   |
| Urothelial                   | 0                   | 0                            | 0                  | 1                                    | 1                   |
| Digestive                    | 0                   | 0                            | 0                  | 3                                    | 3                   |
| Others                       | 5                   | 0                            | 0                  | 14                                   | 19                  |
| <b>FPC = Head &amp; Neck</b> | <b>929 (5.5%)</b>   | <b>167 (14.8%)</b>           | <b>5 (15.6%)</b>   | <b>2286 (8.0%)</b>                   | <b>3387 (7.2%)</b>  |
| SPC                          |                     |                              |                    |                                      |                     |
| <b>ALL</b>                   | <b>51 (5,5%)</b>    | <b>0 (0,0%)</b>              | <b>0 (0,0%)</b>    | <b>147 (6,4%)</b>                    | <b>198 (5,8%)</b>   |
| Skin                         | 2                   | 0                            | 0                  | 11                                   | 13                  |
| Head & Neck                  | 27                  | 0                            | 0                  | 74                                   | 101                 |
| Lung                         | 7                   | 0                            | 0                  | 25                                   | 32                  |
| Prostate                     | 0                   | 0                            | 0                  | 3                                    | 3                   |
| Colorectal                   | 2                   | 0                            | 0                  | 3                                    | 5                   |
| Breast                       | 0                   | 0                            | 0                  | 4                                    | 4                   |
| Connective tissue            | 0                   | 0                            | 0                  | 4                                    | 4                   |
| Urothelial                   | 0                   | 0                            | 0                  | 1                                    | 1                   |
| Digestive                    | 4                   | 0                            | 0                  | 6                                    | 10                  |
| Thyroid                      | 2                   | 0                            | 0                  | 2                                    | 4                   |
| Others                       | 7                   | 0                            | 0                  | 14                                   | 21                  |
| <b>FPC = Lung</b>            | <b>2125 (12.5%)</b> | <b>486 (43.0%)</b>           | <b>11 (34.4%)</b>  | <b>2084 (7.3%)</b>                   | <b>4706 (10.0%)</b> |
| SPC                          |                     |                              |                    |                                      |                     |
| <b>ALL</b>                   | <b>33 (1,6%)</b>    | <b>6 (1,2%)</b>              | <b>1 (9,1%)</b>    | <b>114 (5,5%)</b>                    | <b>154 (3,3%)</b>   |
| Skin                         | 0                   | 1                            | 0                  | 7                                    | 8                   |
| Head & Neck                  | 1                   | 0                            | 0                  | 12                                   | 13                  |
| Lung                         | 12                  | 0                            | 0                  | 21                                   | 33                  |
| Prostate                     | 0                   | 0                            | 0                  | 4                                    | 4                   |
| Colorectal                   | 2                   | 3                            | 0                  | 7                                    | 12                  |
| Breast                       | 0                   | 0                            | 0                  | 6                                    | 6                   |
| Connective tissue            | 6                   | 0                            | 0                  | 14                                   | 20                  |
| Gyneco                       | 0                   | 0                            | 0                  | 1                                    | 1                   |
| Urothelial                   | 0                   | 0                            | 0                  | 3                                    | 3                   |
| Digestive                    | 3                   | 0                            | 1                  | 9                                    | 13                  |
| Thyroid                      | 0                   | 0                            | 0                  | 1                                    | 1                   |
| Others                       | 9                   | 2                            | 0                  | 29                                   | 40                  |
| <b>FPC = Prostate</b>        | <b>643 (3.8%)</b>   | <b>11 (1.0%)</b>             | <b>0 (0.0%)</b>    | <b>1732 (6.0%)</b>                   | <b>2386 (5.1%)</b>  |
| SPC                          |                     |                              |                    |                                      |                     |
| <b>ALL</b>                   | <b>7 (1,1%)</b>     | <b>0 (0,0%)</b>              | <b>0 (0,0%)</b>    | <b>70 (4,0%)</b>                     | <b>77 (3,2%)</b>    |
| Skin                         | 1                   | 0                            | 0                  | 2                                    | 3                   |
| Head & Neck                  | 2                   | 0                            | 0                  | 7                                    | 9                   |
| Lung                         | 1                   | 0                            | 0                  | 11                                   | 12                  |
| Prostate                     | 0                   | 0                            | 0                  | 1                                    | 1                   |
| Colorectal                   | 0                   | 0                            | 0                  | 8                                    | 8                   |
| Breast                       | 0                   | 0                            | 0                  | 2                                    | 2                   |

|                                |                     |                  |                 |                     |                      |
|--------------------------------|---------------------|------------------|-----------------|---------------------|----------------------|
| Connective tissue              | 0                   | 0                | 0               | 4                   | 4                    |
| Urothelial                     | 1                   | 0                | 0               | 9                   | 10                   |
| Digestive                      | 0                   | 0                | 0               | 8                   | 8                    |
| Others                         | 2                   | 0                | 0               | 18                  | 20                   |
| <b>FPC = Colorectal</b>        | <b>1099 (6.5%)</b>  | <b>30 (2.7%)</b> | <b>1 (3.1%)</b> | <b>1545 (5.4%)</b>  | <b>2675 (5.7%)</b>   |
| SPC                            |                     |                  |                 |                     |                      |
| <b>ALL</b>                     | <b>21 (1,9%)</b>    | <b>0 (0,0%)</b>  | <b>0 (0,0%)</b> | <b>96 (6,2%)</b>    | <b>117 (4,4%)</b>    |
| Skin                           | 3                   | 0                | 0               | 2                   | 5                    |
| Head & Neck                    | 0                   | 0                | 0               | 5                   | 5                    |
| Lung                           | 4                   | 0                | 0               | 11                  | 15                   |
| Prostate                       | 1                   | 0                | 0               | 5                   | 6                    |
| Colorectal                     | 1                   | 0                | 0               | 24                  | 25                   |
| Breast                         | 0                   | 0                | 0               | 5                   | 5                    |
| Connective tissue              | 4                   | 0                | 0               | 11                  | 15                   |
| Gyneco                         | 0                   | 0                | 0               | 4                   | 4                    |
| Urothelial                     | 0                   | 0                | 0               | 3                   | 3                    |
| Digestive                      | 3                   | 0                | 0               | 11                  | 14                   |
| Thyroid                        | 0                   | 0                | 0               | 3                   | 3                    |
| Others                         | 5                   | 0                | 0               | 12                  | 17                   |
| <b>FPC = Breast</b>            | <b>4809 (28.3%)</b> | <b>33 (2.9%)</b> | <b>1 (3.1%)</b> | <b>6857 (23.9%)</b> | <b>11700 (25.0%)</b> |
| SPC                            |                     |                  |                 |                     |                      |
| <b>ALL</b>                     | <b>98 (2,0%)</b>    | <b>0 (0,0%)</b>  | <b>0 (0,0%)</b> | <b>135 (2,0%)</b>   | <b>233 (2,0%)</b>    |
| Skin                           | 7                   | 0                | 0               | 7                   | 14                   |
| Head & Neck                    | 5                   | 0                | 0               | 3                   | 8                    |
| Lung                           | 7                   | 0                | 0               | 14                  | 21                   |
| Colorectal                     | 5                   | 0                | 0               | 4                   | 9                    |
| Breast                         | 34                  | 0                | 0               | 35                  | 69                   |
| Connective tissue              | 5                   | 0                | 0               | 14                  | 19                   |
| Gyneco                         | 7                   | 0                | 0               | 15                  | 22                   |
| Urothelial                     | 5                   | 0                | 0               | 5                   | 10                   |
| Digestive                      | 7                   | 0                | 0               | 8                   | 15                   |
| Thyroid                        | 5                   | 0                | 0               | 6                   | 11                   |
| Others                         | 11                  | 0                | 0               | 24                  | 35                   |
| <b>FPC = Connective tissue</b> | <b>646 (3.8%)</b>   | <b>19 (1.7%)</b> | <b>0 (0.0%)</b> | <b>2253 (7.9%)</b>  | <b>2918 (6.2%)</b>   |
| SPC                            |                     |                  |                 |                     |                      |
| <b>ALL</b>                     | <b>37 (5,7%)</b>    | <b>0 (0,0%)</b>  | <b>0 (0,0%)</b> | <b>213 (9,5%)</b>   | <b>250 (8,6%)</b>    |
| Skin                           | 1                   | 0                | 0               | 27                  | 28                   |
| Head & Neck                    | 2                   | 0                | 0               | 14                  | 16                   |
| Lung                           | 2                   | 0                | 0               | 10                  | 12                   |
| Prostate                       | 0                   | 0                | 0               | 2                   | 2                    |
| Colorectal                     | 3                   | 0                | 0               | 4                   | 7                    |
| Breast                         | 1                   | 0                | 0               | 6                   | 7                    |
| Connective tissue              | 6                   | 0                | 0               | 27                  | 33                   |
| Gyneco                         | 3                   | 0                | 0               | 7                   | 10                   |
| Urothelial                     | 2                   | 0                | 0               | 4                   | 6                    |
| Digestive                      | 6                   | 0                | 0               | 12                  | 18                   |
| Thyroid                        | 0                   | 0                | 0               | 5                   | 5                    |
| Others                         | 11                  | 0                | 0               | 95                  | 106                  |
| <b>FPC = Gyneco</b>            | <b>1105 (6.5%)</b>  | <b>62 (5.5%)</b> | <b>0 (0.0%)</b> | <b>1967 (6.9%)</b>  | <b>3134 (6.7%)</b>   |

SPC

|                         |                    |                    |                 |                    |                    |
|-------------------------|--------------------|--------------------|-----------------|--------------------|--------------------|
| <b>ALL</b>              | <b>21 (1,9%)</b>   | <b>0 (0,0%)</b>    | <b>0 (0,0%)</b> | <b>96 (4,9%)</b>   | <b>117 (3,7%)</b>  |
| Skin                    | 0                  | 0                  | 0               | 2                  | 2                  |
| Head & Neck             | 1                  | 0                  | 0               | 2                  | 3                  |
| Lung                    | 0                  | 0                  | 0               | 5                  | 5                  |
| Colorectal              | 1                  | 0                  | 0               | 5                  | 6                  |
| Breast                  | 5                  | 0                  | 0               | 13                 | 18                 |
| Connective tissue       | 5                  | 0                  | 0               | 21                 | 26                 |
| Gyneco                  | 6                  | 0                  | 0               | 29                 | 35                 |
| Urothelial              | 0                  | 0                  | 0               | 2                  | 2                  |
| Digestive               | 0                  | 0                  | 0               | 5                  | 5                  |
| Thyroid                 | 0                  | 0                  | 0               | 4                  | 4                  |
| Others                  | 3                  | 0                  | 0               | 8                  | 11                 |
| <b>FPC = Urothelial</b> | <b>434 (2.6%)</b>  | <b>142 (12.6%)</b> | <b>1 (3.1%)</b> | <b>837 (2.9%)</b>  | <b>1414 (3.0%)</b> |
| SPC                     |                    |                    |                 |                    |                    |
| <b>ALL</b>              | <b>7 (1,6%)</b>    | <b>0 (0,0%)</b>    | <b>0 (0,0%)</b> | <b>80 (9,6%)</b>   | <b>87 (6,2%)</b>   |
| Skin                    | 0                  | 0                  | 0               | 1                  | 1                  |
| Head & Neck             | 0                  | 0                  | 0               | 7                  | 7                  |
| Lung                    | 1                  | 0                  | 0               | 14                 | 15                 |
| Prostate                | 1                  | 0                  | 0               | 9                  | 10                 |
| Colorectal              | 1                  | 0                  | 0               | 2                  | 3                  |
| Breast                  | 0                  | 0                  | 0               | 7                  | 7                  |
| Connective tissue       | 0                  | 0                  | 0               | 10                 | 10                 |
| Gyneco                  | 0                  | 0                  | 0               | 2                  | 2                  |
| Urothelial              | 4                  | 0                  | 0               | 11                 | 15                 |
| Digestive               | 0                  | 0                  | 0               | 5                  | 5                  |
| Thyroid                 | 0                  | 0                  | 0               | 1                  | 1                  |
| Others                  | 0                  | 0                  | 0               | 11                 | 11                 |
| <b>FPC = Digestive</b>  | <b>1445 (8.5%)</b> | <b>53 (4.7%)</b>   | <b>1 (3.1%)</b> | <b>1498 (5.2%)</b> | <b>2997 (6.4%)</b> |
| SPC                     |                    |                    |                 |                    |                    |
| <b>ALL</b>              | <b>36 (2,5%)</b>   | <b>0 (0,0%)</b>    | <b>0 (0,0%)</b> | <b>65 (4,3%)</b>   | <b>101 (3,4%)</b>  |
| Skin                    | 2                  | 0                  | 0               | 2                  | 4                  |
| Head & Neck             | 1                  | 0                  | 0               | 10                 | 11                 |
| Lung                    | 3                  | 0                  | 0               | 8                  | 11                 |
| Prostate                | 0                  | 0                  | 0               | 2                  | 2                  |
| Colorectal              | 3                  | 0                  | 0               | 5                  | 8                  |
| Breast                  | 5                  | 0                  | 0               | 3                  | 8                  |
| Connective tissue       | 3                  | 0                  | 0               | 8                  | 11                 |
| Gyneco                  | 1                  | 0                  | 0               | 3                  | 4                  |
| Urothelial              | 0                  | 0                  | 0               | 1                  | 1                  |
| Digestive               | 8                  | 0                  | 0               | 13                 | 21                 |
| Thyroid                 | 2                  | 0                  | 0               | 1                  | 3                  |
| Others                  | 8                  | 0                  | 0               | 9                  | 17                 |
| <b>FPC = Thyroid</b>    | <b>220 (1.3%)</b>  | <b>7 (0.6%)</b>    | <b>0 (0.0%)</b> | <b>1106 (3.9%)</b> | <b>1333 (2.8%)</b> |
| SPC                     |                    |                    |                 |                    |                    |
| <b>ALL</b>              | <b>4 (1,8%)</b>    | <b>0 (0,0%)</b>    | <b>0 (0,0%)</b> | <b>20 (1,8%)</b>   | <b>24 (1,8%)</b>   |
| Head & Neck             | 1                  | 0                  | 0               | 2                  | 3                  |
| Lung                    | 0                  | 0                  | 0               | 4                  | 4                  |
| Prostate                | 0                  | 0                  | 0               | 1                  | 1                  |
| Breast                  | 1                  | 0                  | 0               | 6                  | 7                  |
| Connective tissue       | 1                  | 0                  | 0               | 2                  | 3                  |
| Gyneco                  | 1                  | 0                  | 0               | 1                  | 2                  |

|                     |                     |                  |                   |                     |                     |
|---------------------|---------------------|------------------|-------------------|---------------------|---------------------|
| Digestive           | 0                   | 0                | 0                 | 1                   | 1                   |
| Thyroid             | 0                   | 0                | 0                 | 1                   | 1                   |
| Others              | 0                   | 0                | 0                 | 2                   | 2                   |
| <b>FPC = Others</b> | <b>3393 (20.0%)</b> | <b>64 (5.7%)</b> | <b>12 (37.5%)</b> | <b>5791 (20.2%)</b> | <b>9260 (19.8%)</b> |
| SPC                 |                     |                  |                   |                     |                     |
| <b>ALL</b>          | <b>113 (3,3%)</b>   | <b>0 (0,0%)</b>  | <b>0 (0,0%)</b>   | <b>313 (5,4%)</b>   | <b>426 (4,6%)</b>   |
| Skin                | 13                  | 0                | 0                 | 21                  | 34                  |
| Head & Neck         | 6                   | 0                | 0                 | 35                  | 41                  |
| Lung                | 3                   | 0                | 0                 | 16                  | 19                  |
| Prostate            | 2                   | 0                | 0                 | 2                   | 4                   |
| Colorectal          | 3                   | 0                | 0                 | 7                   | 10                  |
| Breast              | 8                   | 0                | 0                 | 16                  | 24                  |
| Connective tissue   | 12                  | 0                | 0                 | 38                  | 50                  |
| Gyneco              | 1                   | 0                | 0                 | 8                   | 9                   |
| Urothelial          | 0                   | 0                | 0                 | 13                  | 13                  |
| Digestive           | 5                   | 0                | 0                 | 18                  | 23                  |
| Thyroid             | 2                   | 0                | 0                 | 14                  | 16                  |
| Others              | 58                  | 0                | 0                 | 125                 | 183                 |
